# Supplementary material for: Sarcomatoid hepatocellular carcinoma: From clinical features to cancer genome
Source: PubMed Central journal article supplement (PMC8446410; doi:10.1002/cam4.4162), 2021-07-31
Supplement: CAM4-10-6227-s001.pdf [file CAM4-10-6227-s001.pdf]

## Supplemental figures

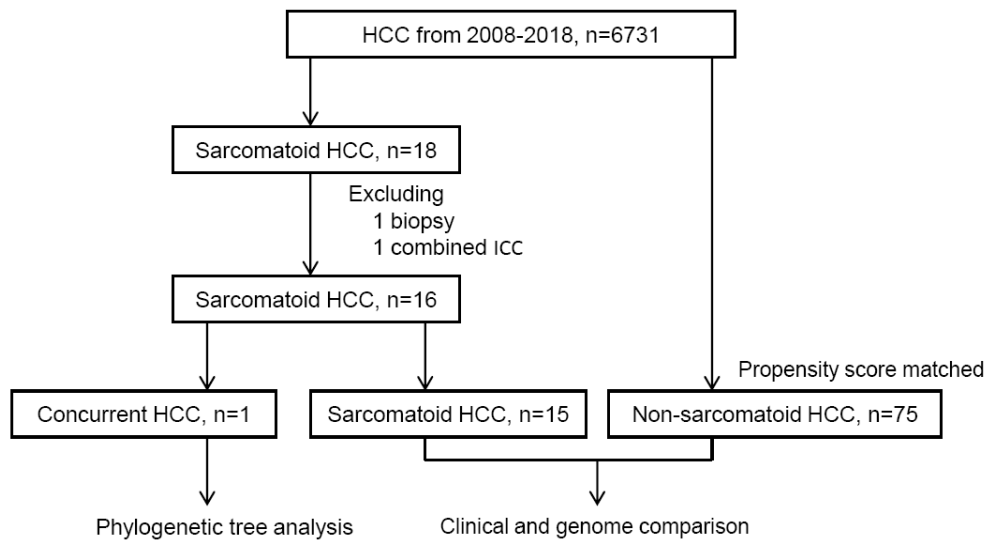

Fig. S1. Flow chart of patient selections.

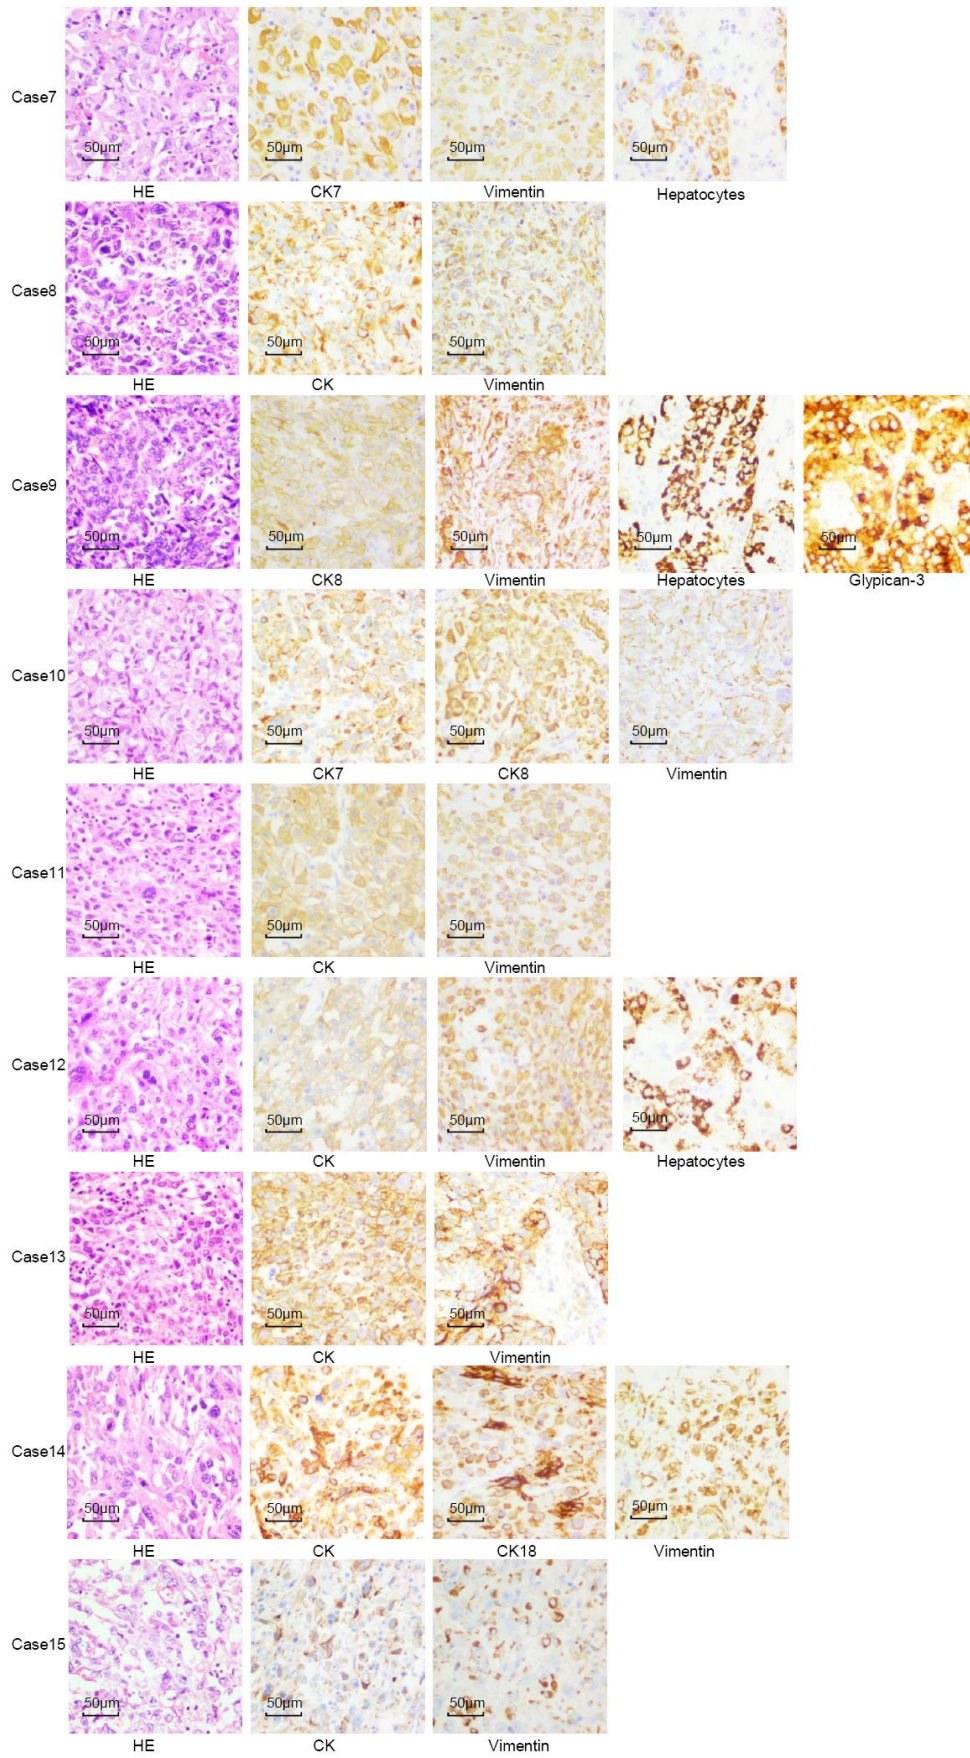

Fig. S2. The histopathological presentation of sarcomatoid HCC (case 7-15).

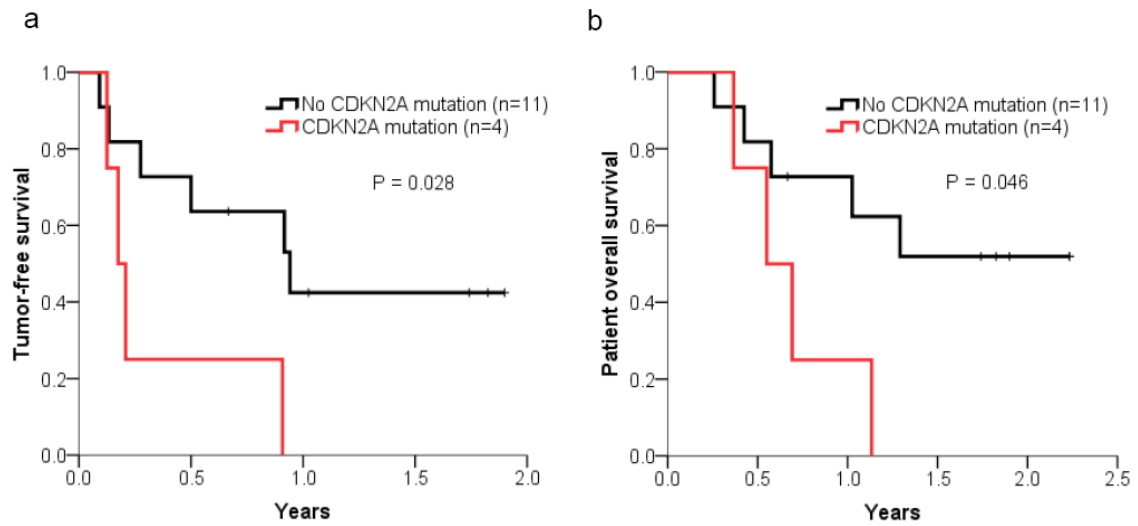

**Fig. S3.** The comparison of survival curves between sarcomatoid HCC patients with and without CDKN2A mutation. **a** tumor-free survival curves; **b** patient overall survival curves.

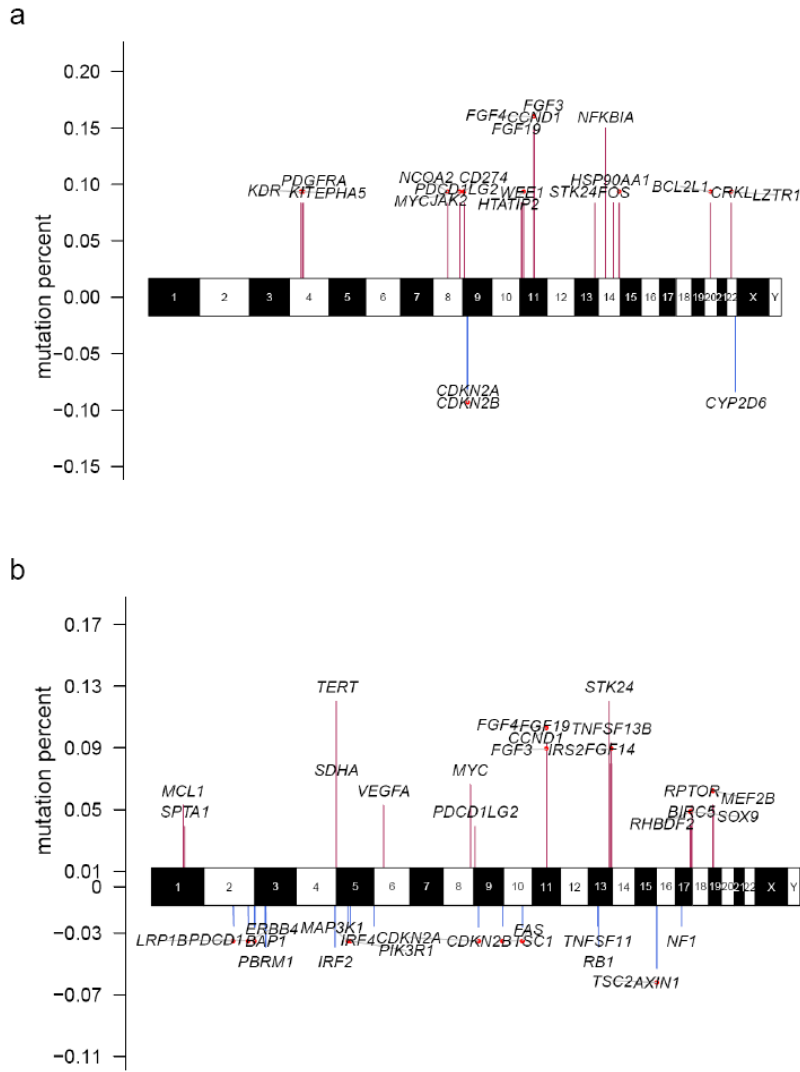

Fig. S4. Copy number variants in sarcomatoid HCC (a) and non-sarcomatoid HCC (b).

a

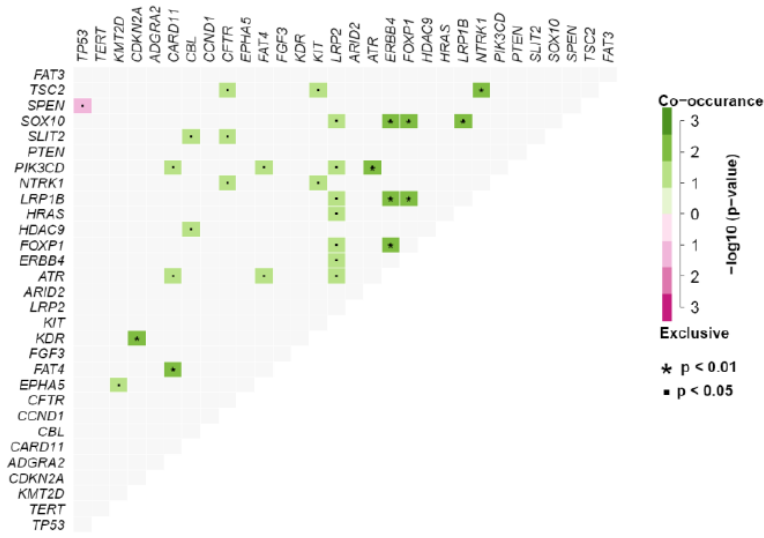

b

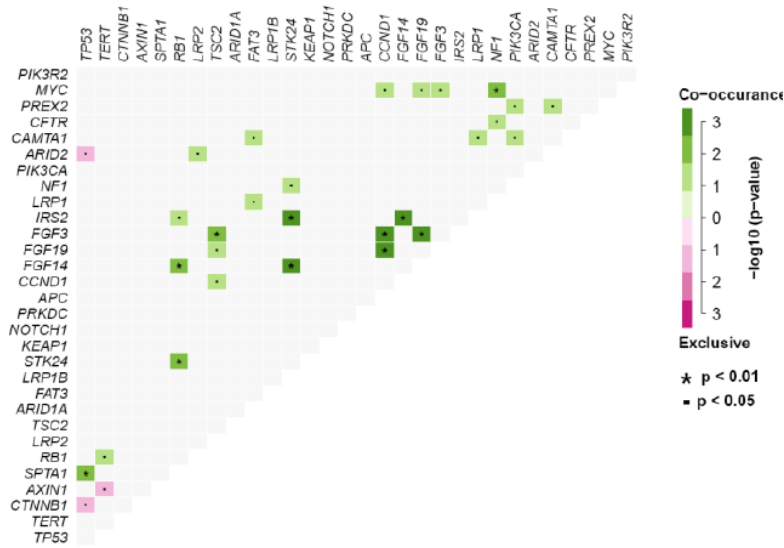

Fig. S5. Concomitant genomic alterations detected in sarcomatoid HCC (a) and non-sarcomatoid HCC (b).
